# Supplementary material for: Rapid and near-complete dissolution of wood lignin at ≤80°C by a recyclable acid hydrotrope
Source: PubMed Central journal article supplement — Sci Adv. 2017 Sep 15;3(9):e1701735. doi: 10.1126/sciadv.1701735 (PMC5600535; doi:10.1126/sciadv.1701735), 2017-09-15
Supplement: 1701735_SM.pdf [file 1701735_SM.pdf]

## Supplementary Materials for **Rapid and near-complete dissolution of wood lignin at $\leq 80^{\circ}\text{C}$ by a recyclable acid hydrotrope**

Liheng Chen, Jinze Dou, Qianli Ma, Ning Li, Ruchun Wu, Huiyang Bian, Daniel J. Yelle,  
Tapani Vuorinen, Shiyu Fu, Xuejun Pan, Junyong (J.Y.) Zhu

Published 15 September 2017, *Sci. Adv.* **3**, e1701735 (2017)  
DOI: 10.1126/sciadv.1701735

### **This PDF file includes:**

- fig. S1. Optical microscopy images of wood fibers produced using *p*-TsOH fractionation under low-severity conditions (fiber lignin content, 16%), followed by mechanical refining to 550-ml Canadian Standard Freeness.
- fig. S2. GPC-measured molecular weight distribution of LNPs from fractionation of Wiley-milled poplar NE222 using *p*-TsOH under three different conditions.
- fig. S3. Catalysis of carbohydrate hydrolysis and lignin degradation by *p*-TsOH.
- table S1. Duplicate fractionation runs under six sets of conditions to demonstrate the repeatability of *p*-TsOH fractionation experiments.
- table S2. Comparisons of chemical compositions of fractionated poplar NE222 WISs between the first cycle using fresh *p*-TsOH solution and the recycle run using spent *p*-TsOH acid liquor.

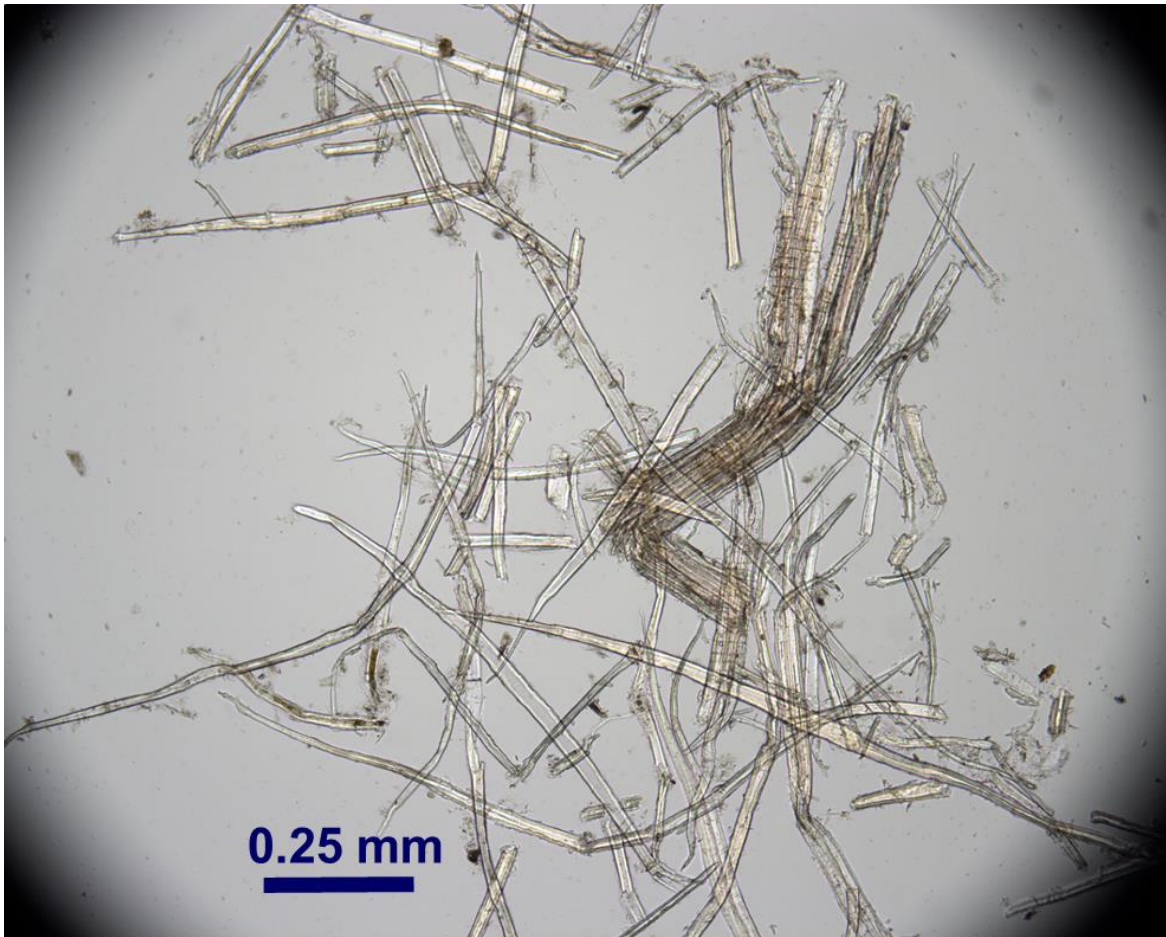

**fig. S1. Optical microscopy images of wood fibers produced using *p*-TsOH fractionation under low-severity conditions (fiber lignin content, 16%), followed by mechanical refining to 550-ml Canadian Standard Freeness.**

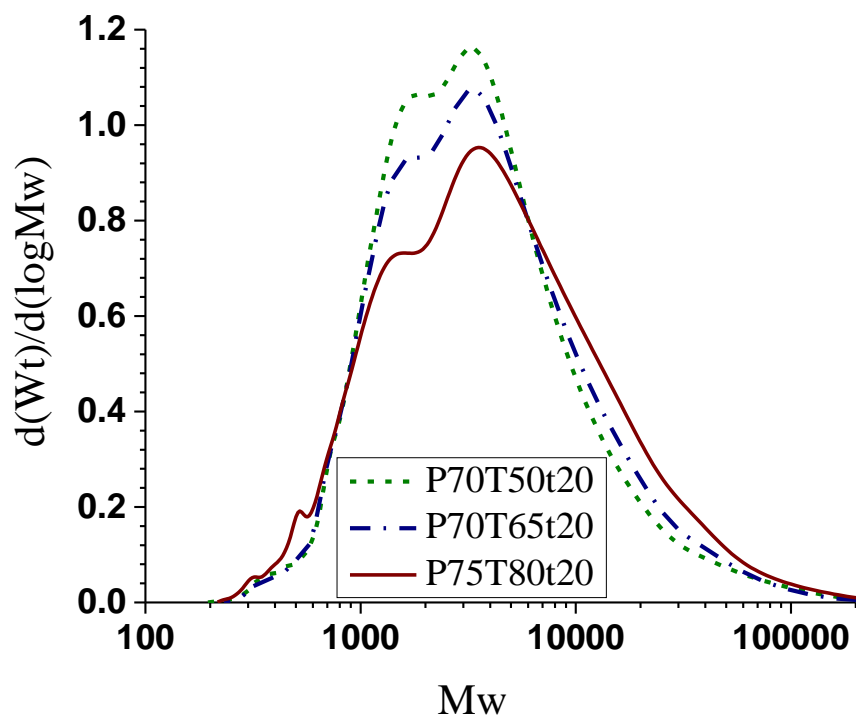

**fig. S2.** GPC-measured molecular weight distribution of LNPs from fractionation of Wiley-milled poplar NE222 using *p*-TsOH under three different conditions.

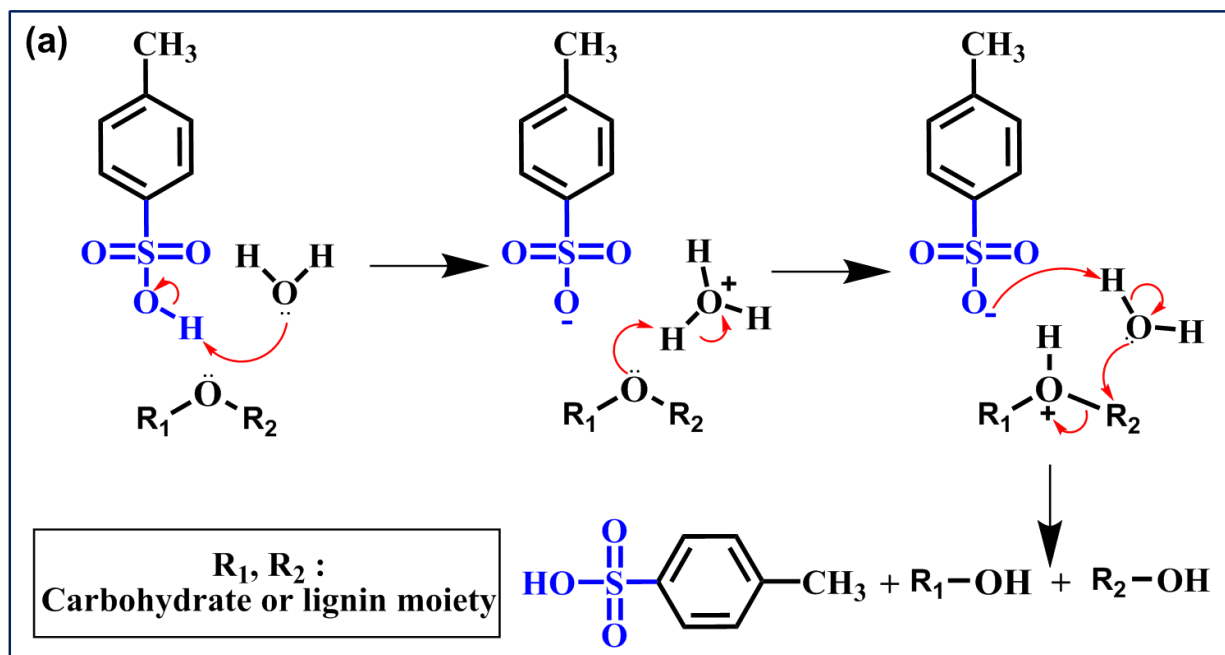

fig. S3. Catalysis of carbohydrate hydrolysis and lignin degradation by *p*-TsOH.

**table S1. Duplicate fractionation runs under six sets of conditions to demonstrate the repeatability of *p*-TsOH fractionation experiments.** The numbers are chemical compositions in the water-insoluble solids (WIS).

| <b>Sample Label</b>       | <b>Glucan (%)</b> | <b>Xylan (%)</b> | <b>Mannan (%)</b> | <b>Lignin (%)</b> | <b>WIS yield (%)</b> |
|---------------------------|-------------------|------------------|-------------------|-------------------|----------------------|
| P70T50t35-1 <sup>st</sup> | 65.1              | 7.2              | 4.8               | 18.7              | 73.3                 |
| P70T50t35-2 <sup>nd</sup> | 59.3              | 7.7              | 3.8               | 19.8              | 75.4                 |
| P70T65t10-1 <sup>st</sup> | 61.1              | 6.6              | 5.0               | 24.2              | 70.4                 |
| P70T65t10-2 <sup>nd</sup> | 61.8              | 6.9              | 4.1               | 17.6              | 68.4                 |
| P70T80t20-1 <sup>st</sup> | 64.2              | 6.5              | 4.3               | 8.8               | 58.8                 |
| P70T80t20-2 <sup>nd</sup> | 61.9              | 6.0              | 4.1               | 8.8               | 58.9                 |
| P75T50t20-1 <sup>st</sup> | 55.9              | 7.1              | 4.5               | 17.8              | 69.7                 |
| P75T50t20-2 <sup>nd</sup> | 59.0              | 6.8              | 4.1               | 18.5              | 71.5                 |
| P75T65t60-1 <sup>st</sup> | 75.7              | 5.5              | 4.8               | 7.7               | 57.1                 |
| P75T65t60-2 <sup>nd</sup> | 73.8              | 4.6              | 3.8               | 7.0               | 56.8                 |
| P75T80t05-1 <sup>st</sup> | 71.5              | 6.4              | 4.0               | 10.9              | 60.5                 |
| P75T80t05-2 <sup>nd</sup> | 68.3              | 6.8              | 3.8               | 12.6              | 65.7                 |
| P80T80t60-1 <sup>st</sup> | 73.8              | 4.1              | 2.8               | 7.6               | 57.0                 |
| P80T80t60-2 <sup>nd</sup> | 62.7              | 2.3              | 2.0               | 9.0               | 58.1                 |

**table S2. Comparisons of chemical compositions of fractionated poplar NE222 WISs between the first cycle using fresh *p*-TsOH solution and the recycle run using spent *p*-TsOH acid liquor.**

| <b>Sample Label <sup>1</sup></b> | <b>Glucan<br/>(%)</b> | <b>Xylan<br/>(%)</b> | <b>Mannan<br/>(%)</b> | <b>Lignin<br/>(%)</b> |
|----------------------------------|-----------------------|----------------------|-----------------------|-----------------------|
| P55T80t20-1 <sup>st</sup>        | 48.2±1.1              | 10.8±0.0             | 2.3±0.2               | 21.4±0.1              |
| P55T80t20-2 <sup>nd</sup>        | 47.6±0.4              | 9.1±0.4              | 2.3±0.0               | 22.3±0.4              |
| P80T80t20-1 <sup>st</sup>        | 71.1±1.4              | 5.3±0.0              | 2.7±0.1               | 4.4±0.2               |
| P80T80t20-2 <sup>nd</sup>        | 74.1±1.4              | 5.3±0.0              | 2.7±0.2               | 4.8±0.0               |
